# Supplementary material for: Lactational Changes of Phospholipids Content and Composition in Chinese Breast Milk
Source: MDPI journal article supplement (doi:10.3390/nu14081539), 2022-04-07
Supplement: s1 [file s1]

**Table S1.** The correlations between human milk phospholipids concentration and baseline characteristics

|                                        | PE      | PI      | PS      | PC      | SM      | TPL     |
|----------------------------------------|---------|---------|---------|---------|---------|---------|
| Mothers                                |         |         |         |         |         |         |
| Age (years)                            | 0.008   | 0.014   | -0.014  | -0.006  | 0.028   | 0.008   |
| Pre-pregnancy BMI (kg/m <sup>2</sup> ) | 0.013   | 0.014   | 0.019   | 0.031   | 0.040   | 0.027   |
| Gestational weight gain (kg)           | -0.040  | -0.037  | -0.054* | -0.037  | -0.055* | -0.049* |
| Delivery mode                          | -0.017  | 0.009   | -0.052* | -0.017  | -0.037* | -0.022  |
| Infants                                |         |         |         |         |         |         |
| Birth weight (kg)                      | -0.029  | -0.064* | -0.036  | -0.068* | 0.002   | -0.037  |
| Birth length (cm)                      | -0.061* | -0.109* | -0.047* | -0.119* | 0.003   | -0.066* |
| Infant gender                          | -0.010  | -0.001  | 0.002   | -0.013  | 0.001   | -0.006  |

Correlations between concentration of human milk phospholipids and baseline characteristics were analyzed via Spearman correlations (categorical variables) and Pearson correlation (continuous variables).

\*indicated  $p < 0.05$ .

Abbreviations: PC, phosphatidylcholine; PE, phosphatidylethanolamine; PI, phosphatidylinositol; PS, phosphatidylserine; SM, sphingomyelin; TPL, total phospholipid.
